# Supplementary material
Source: MDPI journal article supplement (https://www.mdpi.com/2504-477X/5/8/201)
Supplement: s1 [file s1]

Archive with 1 entries (1 files):
- jcs-1322068-supplementary.pdf
