# Supplementary material
Source: MDPI journal article supplement (https://www.mdpi.com/2504-477X/5/8/201)
Supplement: s1 [file s1 › jcs-1322068-supplementary.pdf]

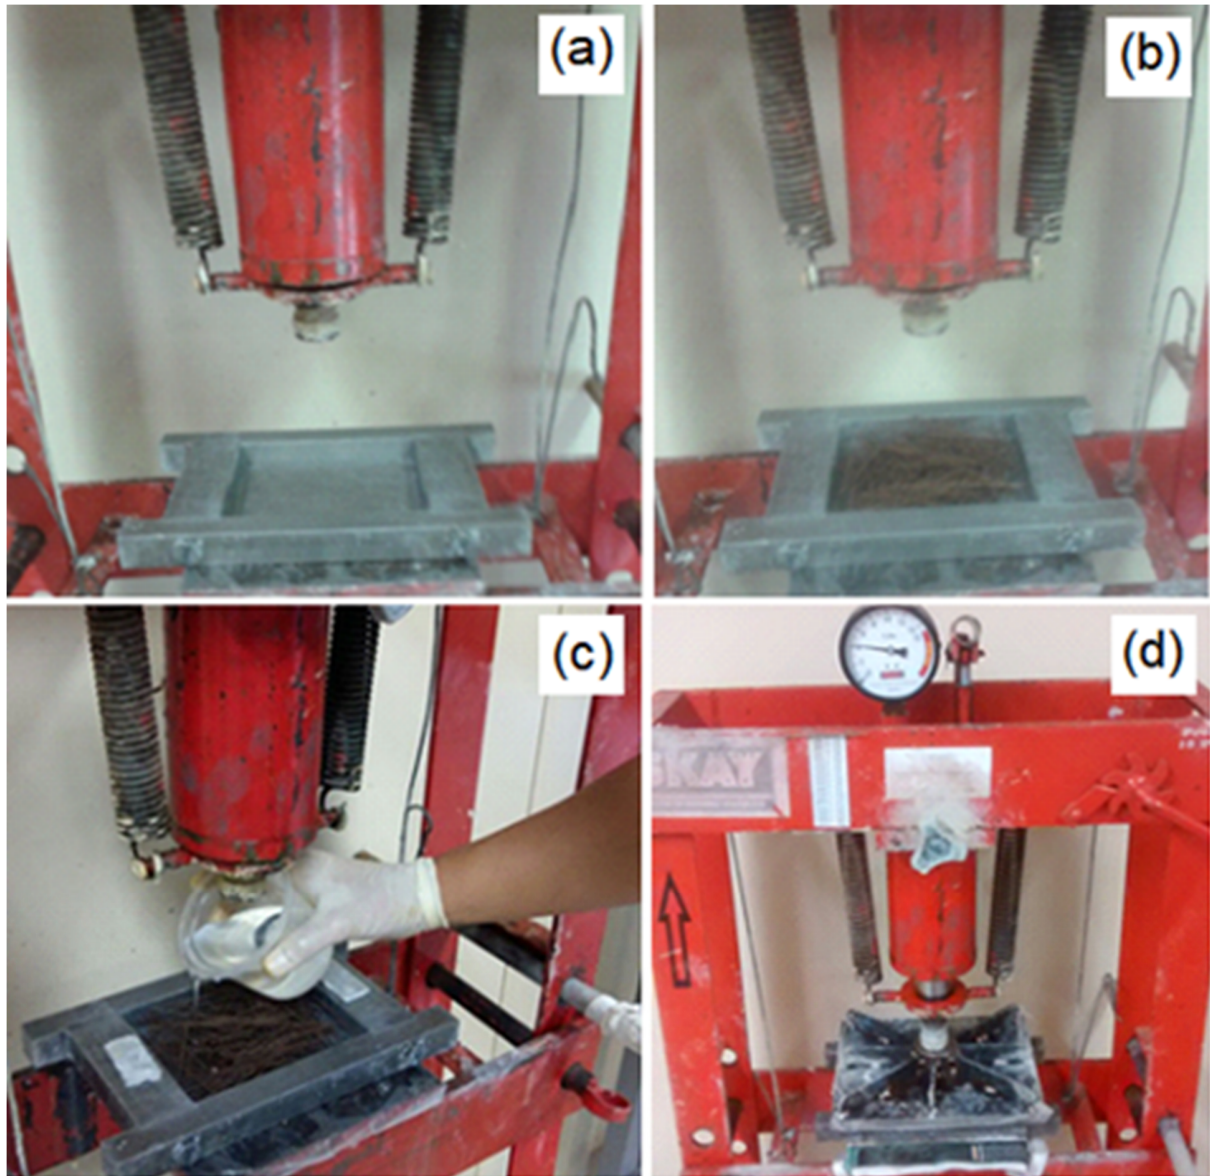

**Figure S1.** Hand lay-up processing. (a) metallic mold, (b) fiber placement, (c) resin addition, and (d) compression molding.

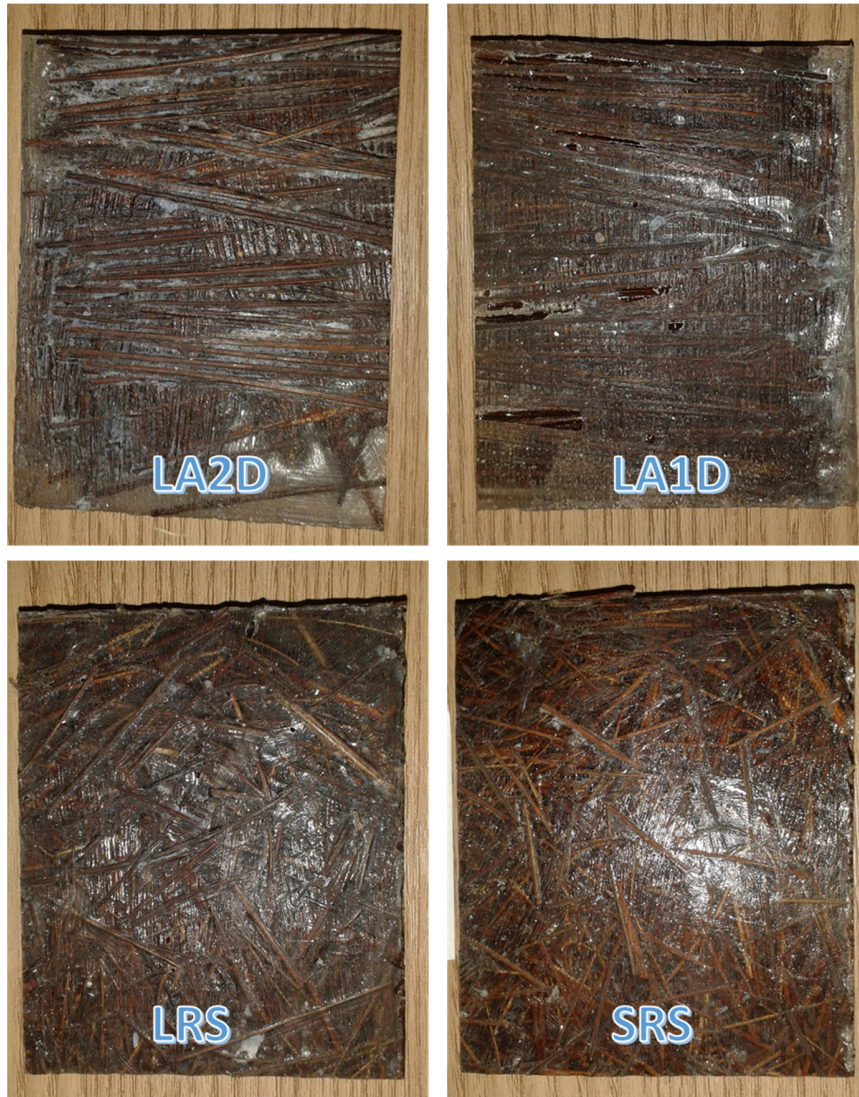

**Figure S2.** Macroscopic aspect of produced composites.

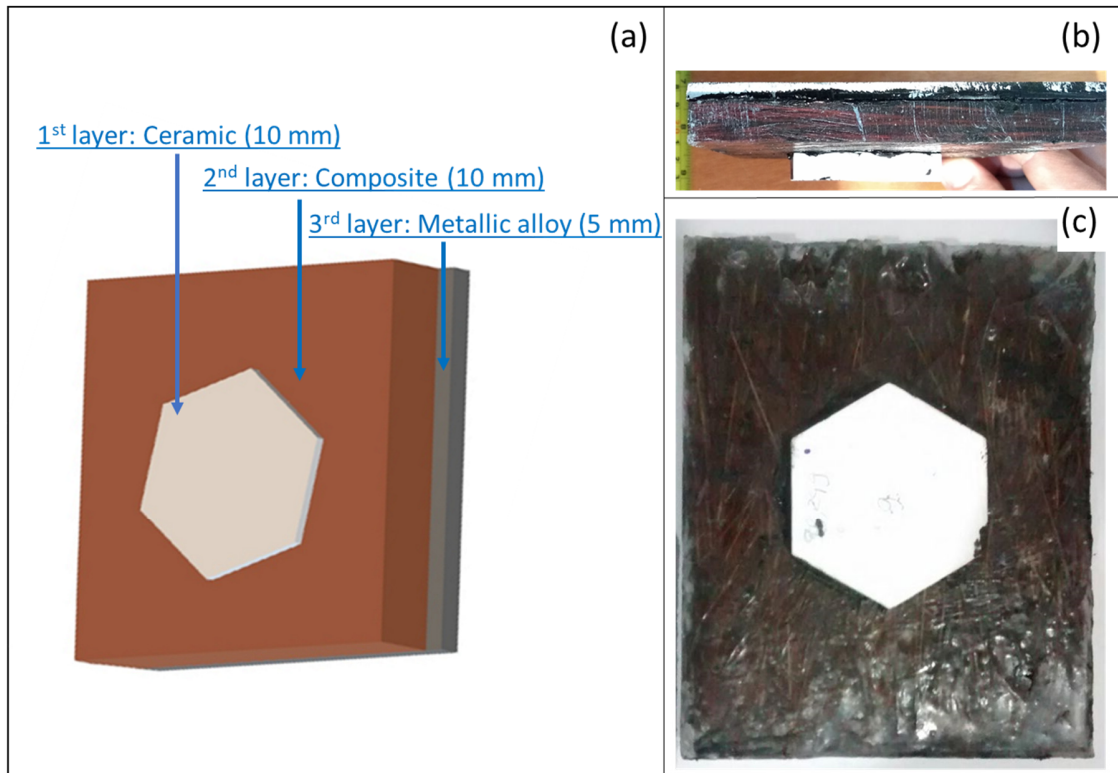

**Figure S3.** MAS (a) schematic illustration, (b) top view, and (c) front view.
